1 **Title: Neutrophil reverse migration from liver fuels neutrophilic inflammation to tissue**  
2 **injury in Nonalcoholic Steatohepatitis.**

3 **Short Title: Neutrophils from liver fuel neutrophilic inflammation in NASH**

4

5 **Authors:** Maria Feliz-Norberto <sup>1</sup>, Cassia Michael <sup>2</sup>, and Sofia de Oliveira <sup>3±</sup>

6 **Affiliations:**

7 <sup>1</sup> Department of Developmental and Molecular Biology, Albert Einstein College of Medicine,  
8 Bronx, NY, USA; Department of Medicine (Hepatology), Albert Einstein College of Medicine,  
9 Bronx, NY, USA.

10 <sup>2</sup> Department of Developmental and Molecular Biology, Albert Einstein College of Medicine,  
11 Bronx, NY, USA; Department of Medicine (Hepatology), Albert Einstein College of Medicine,  
12 Bronx, NY, USA.

13 <sup>3</sup> Department of Medical Microbiology and Immunology, University of Wisconsin Madison,  
14 Madison, United States; Department of Developmental and Molecular Biology, Albert Einstein  
15 College of Medicine, Bronx, NY, USA; Department of Medicine (Hepatology), Albert Einstein  
16 College of Medicine, Bronx, NY, USA; Marion Bessin Liver Research Center, Albert Einstein  
17 College of Medicine and Montefiore Medical Center, Bronx, NY, USA; Einstein-Mount Sinai  
18 Diabetes Research Center, Albert Einstein College of Medicine, Bronx, NY, USA.

19 **±Corresponding Author:** Sofia de Oliveira; [sofia.deoliveira@einsteinmed.org](mailto:sofia.deoliveira@einsteinmed.org)

20 **Grant Support:** This work was supported by Cancer Research Institute/Fibrolamellar Cancer  
21 Foundation and R35 GM118027.

22 **Abbreviations used in this paper:** Nonalcoholic fatty liver disease, NAFLD; nonalcoholic  
23 steatohepatitis, NASH; reactive oxygen species, ROS; Neutrophil Extracellular Traps, NETs;  
24 Neutrophil Extracellular Traps formation, NETosis; HCD, high-cholesterol diet; TNF, tumor  
25 necrosis factor; dpf, days post-fertilization; ND, normal diet; Met, Metformin; Ptx, Pentoxifylline

26

27 **Disclosures:** The authors disclose no conflicts.

28

29 **Authors Contribution:** Conceived and designed experiments: SDO. Performed experiments:  
30 SDO, MFN and CM. Performed analysis: SDO, MFN and CM. Wrote the manuscript: SDO.  
31 Critically reviewed and edited the manuscript: MFN, CM and SDO

32

33 **Abstract:**

34 Inflammation is a hallmark in the progression of nonalcoholic-fatty liver disease (NAFLD) to non-  
35 alcoholic steatohepatitis (NASH). Patients with NAFLD are characterized by a chronic low-grade  
36 systemic metabolic inflammation (i.e., meta-inflammation), which contributes to exacerbated  
37 however dysfunctional immune response. Neutrophils play an important pathological role in  
38 NAFLD progression to NASH; however, how NASH and associated chronic systemic  
39 inflammation impact overall the neutrophil response to injury is completely unexplored. Here, we  
40 investigated how neutrophil response to tissue injury is altered by the presence of NASH. We  
41 used a diet-induced NASH zebrafish model combined with tailfin transection in transgenic  
42 zebrafish larvae to study neutrophilic inflammation. Live non-invasive confocal microscopy was  
43 used to investigate neutrophil recruitment to tailfin injury through time. Photoconversion of  
44 neutrophils at the liver area followed by time-lapse microscopy was performed to evaluate  
45 migration of neutrophils from liver to tailfin injury. Metformin and Pentoxifylline were used to  
46 pharmacologically reduce NASH and liver inflammation. We found that larvae with NASH  
47 display systemic inflammation and increased myelopoiesis. NASH larvae display a dysfunctional  
48 and exacerbated neutrophil response to tailfin injury, characterized by increased neutrophil  
49 recruitment, and delayed resolution of inflammation. Interestingly, we showed that neutrophils  
50 undergo reverse migration from the NASH liver to the wounded tailfin area. Finally,  
51 pharmacological treatment of NASH with Pentoxifylline and Metformin significantly reduced  
52 systemic chronic inflammation and the exacerbated recruitment of neutrophils to tissue injury.  
53 Taken together, our findings suggest that NASH exacerbates neutrophilic inflammation probably  
54 via neutrophil priming at the liver, which can further undergo reverse migration and respond to  
55 secondary inflammatory triggers such as tissue injury. Reverse migration of primed neutrophils

56 from the liver might be an important mechanism that fuels the exacerbated neutrophil response  
57 observed in NASH conditions and associated meta-inflammation contributing to poor prognosis  
58 and increasing death in patients with metabolic syndrome.

59

60 **Keywords:** NAFLD; inflammation; neutrophils; tissue injury; liver, reverse migration

61

62 **Introduction:**

63 Nonalcoholic fatty liver disease (NAFLD) is the hepatic manifestation of metabolic syndrome  
64 (i.e., high blood pressure, high blood sugar, excess body fat around the waist, and abnormal  
65 cholesterol levels) and is a major health issue and economic burden in western societies affecting  
66 around 25-30% of overall population <sup>1,2</sup>. The rising incidence of NAFLD correlates strongly with  
67 the prevalence of metabolic syndrome, type 2 diabetes and obesity<sup>1</sup>. Consumption of calorie rich  
68 diets drastically increase fatty acid availability that causes local and systemic metabolic alterations  
69 and steatosis, hepatocyte injury, inflammation, and fibrosis, all of which are key features of  
70 nonalcoholic steatohepatitis (NASH) a more advanced stage of NAFLD <sup>3</sup>. Systemic metabolic  
71 dysfunction triggers a chronic systemic low-grade of inflammation (i.e., metainflammation),  
72 generating immune imbalances, from cellular to cytokine levels that predisposes patients with  
73 NASH and associated metabolic diseases to chronic inflammation and infections<sup>4, 5</sup>. The high  
74 incidence of such complications drastically impacts this high-risk group, both socially and  
75 economically, and often leads to disability or death - as shown recently with COVID-19 pandemic<sup>6</sup>  
76 <sup>7</sup>. The lack of efficient therapeutic approaches to decrease such impact in this high-risk population  
77 is a clear indicator that we do not fully understand how metabolic syndrome, nutrient excess or  
78 overnutrition, and associated metainflammation are altering and regulating the overall  
79 inflammatory response towards “secondary” inflammatory triggers such as tissue injury.

80 Neutrophils are first line responders to injury that rely in distinct tiers of arsenals to counter threats  
81 including phagocytosis, protease secretion, and neutrophil extracellular traps (NETs)<sup>8</sup>. Such  
82 mechanisms are not only protective but can also be destructive to tissues, therefore neutrophil  
83 production, trafficking, and clearance need to be tightly regulated <sup>9</sup>. Neutrophils have a double-  
84 edge sword function being crucial for effective tissue repair but can also contribute for further

85 damaged in case a dysfunctional response is triggered<sup>8</sup>. Neutrophils have a crucial role on NAFLD  
86 pathophysiology; with circulating neutrophils from patients with NASH exhibiting an activated  
87 and immunosuppressive phenotype<sup>10</sup>. Multiple reports have also found that circulating neutrophils  
88 in NASH have enhanced reactive oxygen species (ROS) production upon inflammatory stimulus,  
89 and undergo spontaneous NETs formation (i.e., NETosis)<sup>10-12</sup>, based on this evidence we decided  
90 to explore how neutrophilic inflammation to tissue injury was impacted in a NASH background.

91 The small vertebrate animal model, the zebrafish, with its unparalleled transparency and genetic  
92 similarity with humans provides a unique opportunity to explore neutrophilic inflammation in a  
93 whole-animal context using non-invasive live imaging<sup>13</sup>. Here, we used a diet-induced NASH  
94 zebrafish model<sup>14,15</sup> by exposing transgenic zebrafish larvae with fluorescently-tagged neutrophils  
95 to a high cholesterol diet for one week and performed tailfin transection<sup>16</sup>. Next, we investigated  
96 neutrophil recruitment to tailfin injury by live non-invasive confocal microscopy. We  
97 demonstrated that zebrafish larvae with NASH have systemic chronic inflammation, and increased  
98 myelopoiesis, which resulted in increased number of neutrophils and macrophages. Importantly,  
99 we found that NASH larvae have an exacerbated neutrophil response to tailfin injury, characterized  
100 by increased neutrophil recruitment and delayed resolution of inflammation. We also found that  
101 neutrophils undergo reverse migration from the NASH liver to the tailfin injury. Finally, we  
102 demonstrated that pharmacological treatment of NASH with Pentoxifylline and Metformin  
103 significantly reduced systemic chronic inflammation and the exacerbated recruitment of  
104 neutrophils to tissue injury. Our findings suggest that NASH exacerbates neutrophilic  
105 inflammation probably via neutrophil priming at the liver, which can further undergo reverse  
106 migration and respond to secondary inflammatory triggers such as tissue injury.

107 **Material and Methods:**

108 **Zebrafish general procedures**

109 All protocols using zebrafish in this study were approved by the University of Wisconsin-Madison  
110 and Albert Einstein College of Medicine Institutional Animal Care and Use Committees (IACUC).  
111 Adult zebrafish and embryos up to 5 days post-fertilization (dpf) were maintained as described  
112 previously<sup>17</sup>. At 5 dpf, larvae were transferred to feeding containers and kept in E3 embryo  
113 medium (E3) [5mM NaCl (Fisher Scientific), 0.17 mM KCl (Dot Scientific), 0.33 mM CaCl<sub>2</sub>  
114 (Acros Organics), 0.33 mM MgSO<sub>4</sub>•7x H<sub>2</sub>O (Sigma-Aldrich)] without methylene blue, until the  
115 end of the experiment. For all experiments, larvae were anesthetized in E3 media without  
116 methylene blue supplemented with 0.16 mg/ml Tricaine (MS222/ethyl 3-aminobenzoate; Sigma-  
117 Aldrich-Aldrich).

118

119 **NASH zebrafish model**

120 Larvae diets were prepared as previously described<sup>14, 15, 18</sup> using Golden Pearl Diet 5-50 nm -  
121 Active Spheres (Brine Shrimp Direct). At 5 days post fertilization (dpf), zebrafish larvae were  
122 separated into treatment groups in E3 without methylene blue as described before<sup>14</sup>. Briefly, 5 dpf  
123 larvae were separated into different feeding tanks corresponding to normal diet (ND) and 10%  
124 high cholesterol diet (HCD) and fed 0.1 mg of food per larvae per day. In general, 60-80 larvae  
125 were placed in a breeding container with 400 mL of E3 without methylene blue and fed 6-8 mg of  
126 ND or HFD daily. Feeding boxes were cleaned and E3 was replaced daily. Short-term feeding was  
127 performed from 5 to 12 dpf. Before experimental procedure, larvae were fasted for 18 hours to  
128 decrease intestine autofluorescence. At 13 dpf, larvae were anesthetized and screened for

129 neutrophil and macrophage markers as needed on Zeiss Axio Zoom stereo microscope  
130 (EMS3/SyCoP3; Zeiss; Zeiss; PlanNeoFluar Z 1X:0.25 FWD 56mm lens).

131

### 132 **Transgenic zebrafish lines**

133 Double transgenic line expressing human fluorescently-tagged histone-2b (H2B) in macrophages  
134 (mpeg1 promoter) and neutrophils (lyzC promoter)<sup>19, 20</sup> Tg(mpeg1:H2B-EGFP; lyzC:H2B-  
135 mCherry)<sup>uwm43Tg/uwm40Tg</sup><sup>19,21</sup>, were used for all experiments with the exception of EDU assay, Cell  
136 ROX assay, and photoconversion assay where wild-type, Tg(mpx:mCherry)<sup>uwm7Tg</sup><sup>22</sup> and  
137 Tg(mpx:dendra)<sup>uwm4Tg</sup><sup>23</sup> were used respectively.

138

### 139 **Fixation of larvae**

140 All larvae were fixed in 2 mL round bottom tubes with 2 mL of fixation solution [1.5%  
141 Formaldehyde (Polysciences, Inc.), 0.1 M PIPES (Sigma-Aldrich), 1 mM MgSO<sub>4</sub> (Sigma-  
142 Aldrich), 2 mM EGTA (Sigma-Aldrich)] overnight at 4 °C. The next day larvae were rinsed and  
143 washed once for 5 min in PBS pH 7.4 (Sigma-Aldrich) and stored at 4° C in PBS until imaging<sup>14</sup>.

144

### 145 **Confocal Microscopy Imaging- zWEDGI**

146 All imaging was performed using a zWEDGI device as previously described<sup>24</sup>. Briefly, an  
147 anesthetized larva was loaded into a zWEDGI chamber for time-lapse imaging. The loading  
148 chamber was filled with 1% low melting point agarose (Sigma-Aldrich) in E3 to retain the larvae  
149 in the proper position. Additional E3 supplemented with 0.16 mg/ml Tricaine was added as needed



150 to avoid dryness and provide required moisture to zebrafish larvae during imaging acquisition. All  
151 images were acquired on a spinning disk confocal microscope (CSU-X; Yokogawa) with a  
152 confocal scanhead on a Zeiss Observer Z.1 inverted microscope equipped with a Photometrics  
153 Evolve EMCCD camera, and an EC Plan Neofluar NA 0.3/10 x air objective, z-stacks, 5  $\mu\text{m}$  optical  
154 sections and 512 x 512 resolution. For whole-larvae imaging, 7 x 1 tile images were taken and  
155 automatically stitched. For time-lapse movies of tailfin injury and neutrophil and macrophage  
156 chemotaxis, images were taken every 2 minutes up to 16 hours post-wounding. For  
157 photoconversion assay, images were taken every 15 minutes up to 6 hours post-wounding. For  
158 Cell ROX imaging, NA 0.5/20 x air objective was used to acquire tailfin images.

159

#### 160 **EDU incorporation, labeling, and quantification**

161 Proliferation in whole larvae was measured using EDU staining, larvae were incubated in 10  $\mu\text{M}$   
162 5-ethynyl-2'-deoxyuridine (EdU) dissolved in embryo medium for 6 hours. Larvae were  
163 euthanized and fixed in 4% Paraformaldehyde (Sigma-Aldrich) overnight at 4°C and stored in  
164 Methanol at -20°C until staining. Click-iT EdU Imaging Kit (Life Technologies) were used for  
165 staining following manufacturer's instructions. Whole-larvae images were acquired as described  
166 previously. For quantification, whole-larvae images acquired and analyzed using IMARIS  
167 Bitplane software (Version 9.5/9.6) rendering mode. The number of EDU positive cells were  
168 automatically counted in whole larvae using the IMARIS spots function. Spots were defined as  
169 particles with 5  $\mu\text{m}$  and 10  $\mu\text{m}$  of X/Y and Z diameter, respectively. To quantify the number of  
170 EDU positive cells at the hematopoietic niches such as, caudal hematopoietic tissues (CHT),  
171 kidney, and thymus a surface for each niche was created. Then a mask for the EDU signal was

172 generated to isolate the signal for EDU positive cells at the hematopoietic niches. EDU positive  
173 cells were automatically counted using IMARIS spots function and same parameters as for whole  
174 larvae.

175

## 176 **Tailfin transection**

177 At 13 dpf, transgenic larvae fed with normal or high cholesterol diet were transferred from feeding  
178 boxes into petri dishes with fresh E3 without methylene blue. Next, larvae were anesthetized in E3  
179 with 0.16 mg/ml of tricaine. Complete transection of the tailfin tip was then performed using a  
180 scalpel with a n°10 sterile surgical blade under a stereomicroscope equipped with a  
181 transillumination base (Nikon SMZ 745; Nikon) without harming the notochord. The success of  
182 transection was immediately confirmed. Larvae were then transferred to a new plate with E3  
183 without methylene blue and let to recover at 28°C until collection timepoint or were mounted  
184 immediately in a zWEDGI for time-lapse confocal microscopy imaging. In photoconversion assay,  
185 tailfin transection was performed with larvae mounted in the zWEDGI.

186

## 187 **Automatic quantification of innate immune cells and cell-tracking on IMARIS**

188 To quantify number of neutrophils and macrophages 13 dpf larvae were fixed and whole-larvae or  
189 tailfin images were acquired as described previously. For quantification of the number of  
190 neutrophils and macrophages in whole-larvae or at different regions, acquired whole-larvae images  
191 were reconstructed on IMARIS Bitplane software (Version 9.5/9.6) rendering mode and total  
192 number of neutrophils and macrophages were automatically counted in the whole larvae using  
193 IMARIS spots function. Spots were defined as particles with 5  $\mu\text{m}$  and 10  $\mu\text{m}$  of X/Y and Z

194 diameter, respectively. To quantify the number of neutrophils and macrophages at different regions  
195 of the zebrafish larvae, a surface for each region/area was created, then a mask for the neutrophil  
196 and macrophage signals were generated setting to “zero” signal outside the surface. Cells were  
197 automatically counted using the IMARIS spots function and defined as particles with 5  $\mu\text{m}$  and 10  
198  $\mu\text{m}$  of X/Y and Z diameter, respectively. To quantify neutrophil recruitment to a tailfin wound  
199 acquired time-lapse movies or images of transected tailfins were reconstructed on IMARIS  
200 software. Neutrophil recruitment was assessed at wound sites (the region posterior to the  
201 circulatory loop, Figure 3A) at various time points (1-, 2-, 4-, 6- and 8- hours post wounding) for  
202 the neutrophil recruitment time-course and 4 and 24hpw for the resolution experiments. Finally,  
203 acquired time-lapse movies (8h acquisition) were used to perform automatic neutrophil tracking  
204 to the tailfin transection on IMARIS. Cell tracking was performed in the field of view (FOV) and  
205 in the wounded area (the region posterior to the circulatory loop, Figure 3A). Mean neutrophil  
206 speed was obtained by IMARIS cell tracking analysis. IMARIS volume rendering mode was used  
207 to obtain representative 3D reconstructions that were used for figures and supplemental movies.

208

### 209 **Systemic Chronic Inflammation (SCI) and neutrophil CHT depletion scorings**

210 To address the systemic effect of cholesterol-enriched diet on neutrophils and macrophages 13 dpf  
211 transgenic larvae were fixed and whole-larvae images were acquired as described previously.  
212 Acquired whole-larvae images were analyzed using IMARIS rendering. Larvae from different  
213 diets or treatments were scored in two different ways, one for systemic chronic inflammation (SCI)  
214 and a second score to evaluate neutrophil depletion from caudal hematopoietic tissue (CHT). For  
215 such, infiltration of neutrophils and macrophages to tissues and organs as well as reduction of the  
216 number of neutrophils from CHT were performed in each larva. Scoring for No SCI, Mild SCI or

217 Severe SCI and for Normal, Mild depletion or Severe depletion/ empty CHT, as shown in  
218 representative images in Suppl. Figure 3.

219

## 220 **Resolution Assay**

221 To address if resolution of inflammation was occurring, tailfin transection was performed on  
222 anesthetized 13 dpf larvae fed with ND or HCD, then larvae were fixed at 4 and 24 hours-post  
223 wounding (hpw). Tailfin images were acquired and automatic quantification of number of  
224 neutrophils recruited to wound area at 4 hpw (peak of recruitment) and 24hpw (resolution) was  
225 performed as described using IMARIS Bitplane Software.

226

## 227 **Cell ROX assay and quantification**

228 To measure ROS production by neutrophils, tailfin transection was performed on anesthetized 13  
229 dpf Tg(mpx:mCherry) larvae fed with ND or HCD as previously described. Larvae were let to  
230 recover in E3 for 3 hours and 30 minutes and then incubated for 45 minutes in 5  $\mu$ M CellROX®  
231 Deep Green Reagent (Invitrogen) solution diluted in E3 without methylene blue. Larvae were  
232 fixed and tailfin images were acquired as described. To address ROS production in neutrophils,  
233 acquired images were analyzed using IMARIS (Bitplane) rendering, IMARIS Coloc mode was  
234 used to quantify number of colocalized voxels and percentage of dataset colocalized in tailfin  
235 wound using neutrophil and Cell ROX signals.

236

## 237 **Neutrophil Photoconversion**

238 Photoconversion of neutrophils at the liver area were performed in anesthetized 13 dpf  
239 Tg(mpx:dendra) larvae fed with ND or HCD and mounted in a zWEDGI. For such, a 405-nm laser  
240 was focused into an oval area surrounding the liver for 45 seconds with 70% power, 10.0  $\mu$ /pixel.  
241 After photoconversion, tailfin amputation was performed and time-lapse movies from the wound  
242 area were performed from 1-6 hours post wounding acquiring one image every 15min, as  
243 described. Number of photoconverted neutrophils and percentage of photoconverted neutrophils  
244 at wound area at 1-, 2-, 4- and 6- hours post wounding were quantified manually using acquired  
245 time-lapse movies, as described.

246

#### 247 **Drug treatments**

248 Larvae were treated with metformin (Met) and pentoxifylline (PTX) as described previously<sup>25</sup>.  
249 Briefly, we dissolved metformin (Enzo Life Sciences) in E3 without methylene blue at a final  
250 concentration of 50  $\mu$ M. PTX was first reconstituted in dimethyl sulfoxide and later diluted 1000 $\times$   
251 in E3 without methylene blue for a final concentration of 50  $\mu$ M. Larvae were treated with these  
252 drugs for 72 hours, from 10-12 days post fertilization. Feedings were performed normally with  
253 cholesterol-enriched diet during drug treatments. Drugs were freshly prepared and replaced daily.  
254 At 12 dpf, drugs were washed and replaced with fresh E3 without methylene blue 24 hours prior  
255 to tailfin amputation to avoid direct effect of neutrophil recruitment during wounding assay. At  
256 13 dpf, tailfin amputation was performed in larvae for all treatments. They were fixed at 4 hpf  
257 and imaged as described. Automatic quantification of neutrophils at wound area, systemic chronic  
258 inflammation (SCI), and neutrophil CHT depletion scorings were performed as described.

259

## 260 **Statistical analysis**

261 All experiments were replicated independently two to three times (N) with multiple samples in  
262 each replicate (n). Least Squared Means analysis in R ([www.r-project.org](http://www.r-project.org))<sup>21</sup> was performed on  
263 pooled replicate experiments, using Tukey method when comparing more than two treatments. For  
264 analysis of systemic chronic inflammation (SCI) and neutrophil CHT depletion we used Chi-  
265 Square test on GraphPad Prism version 8. Graphical representations were done in GraphPad Prism  
266 version 8. Statistical tests, p values, and n numbers used are given in each figure legends.

267

268

269

270 **Results:**

271 **NASH zebrafish larvae display systemic chronic inflammation**

272 Inflammatory response triggered by fat accumulation and associated lipotoxicity is a major  
273 contributor for progression from simple steatosis to NASH REF. Increased number of circulating  
274 myeloid cells, particularly neutrophils, have been reported in NAFLD/NASH<sup>10</sup>. Using a diet  
275 induced NASH zebrafish model that exhibits liver inflammation<sup>14</sup> and metabolic syndrome<sup>26</sup> after  
276 exposure to a high cholesterol diet (HCD) for 8 days (Suppl Fig. 1A), we first evaluated whether  
277 NASH larvae have increased number of myeloid cells. For such, we performed whole-larvae non-  
278 invasive confocal imaging at 13 days-post-fertilization (dpf) of double transgenic larvae  
279 expressing fluorescent nuclear markers in macrophages and in neutrophils [Tg(mpeg1:H2B-GFP;  
280 lyzC:H2B-mCherry)] fed with normal or HCD. We observed that NASH larvae fed with HCD  
281 have a significant increase in the total number of neutrophils and macrophages, 29% and 60%  
282 respectively, when compared to control larvae that were fed with the normal diet (Fig.1 A-C).  
283 Importantly, short exposure to the HCD did not have any impact on larvae development when  
284 compared with normal diet. The NASH and control larvae had similar width and length amongst  
285 the two groups (Suppl. Fig. 1). Nevertheless, larvae fed with HCD revealed mostly a severe  
286 systemic chronic inflammation (SCI) phenotype with enormous infiltration of neutrophils and  
287 macrophages into different tissues and organs (Fig. 1A and D; Suppl. Fig. 2). This was shown by  
288 automatic quantification of the number of these cells at different regions of the zebrafish larvae,  
289 particularly in the liver/posterior intestine, gastrointestinal track/heart and dorsal muscle/skin  
290 (Suppl. Fig. 3). We also observed a cytokine imbalance with several inflammatory mediators  
291 displaying altered gene expression levels in NASH conditions (data not shown). Interestingly,  
292 analysis of the caudal hematopoietic tissue (CHT) region, the main hematopoietic niche at this

293 developmental stage, show drastic neutrophil depletion in NASH larvae fed with HCD (Fig 1A  
294 and E; Suppl. Fig.3B). We further decided to evaluate, how many days we needed to expose larvae  
295 to the HCD to induce SCI. Collecting larvae from 1 to 7 days of feeding (corresponding to 6 days-  
296 post- fertilization to 12 days-post-fertilization) we found that SCI starts to be observed at 4 days  
297 of feeding with severe SCI becoming the main phenotype observed by 7 days (Suppl. Fig. 4), these  
298 observations matched when we also start to observe severe steatosis and infiltration of neutrophils  
299 to liver area<sup>14</sup>. Collectively, these findings indicate NASH is associated with increased number of  
300 myeloid cells and systemic chronic inflammation in zebrafish larvae.

301

### 302 **Proliferation of multipotent progenitors is enhanced in NASH.**

303 The consumption of Western-type diets trigger myelopoiesis and transcriptional reprogramming  
304 of myeloid precursor cells<sup>27</sup>. Next, we decided to address if the increased number of neutrophils  
305 and macrophages found in NASH larvae were associated with increased proliferation at the caudal  
306 hematopoietic tissue (CHT) and the kidney, the hematopoietic niches where myelopoiesis occurs  
307 at this developmental stage<sup>28</sup>. To do so we incubated zebrafish larvae with EDU and measured the  
308 number of cells proliferating in the CHT, kidney, and thymus (Fig. 2). We found an increase in  
309 total proliferation in larvae fed with HCD compared to normal diet (Fig. 2 A and B). As expected,  
310 we also observed an increase in the number of proliferating cells at CHT and kidney, but not at the  
311 thymus (Fig. 2 A and C). In addition, we also observed an increased number of hematopoietic stem  
312 cells in larvae fed with the HCD, which was assessed by automatic quantification CD41+ cells in  
313 whole larvae (Suppl. Fig. 5). This data suggests that NASH larvae have increased myelopoiesis,  
314 explaining the increased number of myeloid cells observed.



315

316 **Neutrophil recruitment to a tailfin injury is exacerbated in NASH.**

317 Multiple studies have shown that metabolic syndrome and meta-inflammation trigger a hyperactive  
318 response of myeloid cells<sup>27, 29, 30</sup>. To test whether NASH zebrafish larvae display a hyperactive  
319 neutrophil response, we used a well-established zebrafish tailfin injury model<sup>16, 19</sup> to investigate  
320 how NASH impacts neutrophilic inflammation. Using tailfin injury as a “secondary” inflammatory  
321 trigger, we observed an exacerbated neutrophil response to the tailfin injury in larvae fed with  
322 HCD compared to normal diet with 2.8 times more neutrophils recruited at the peak of recruitment  
323 (Fig. 3; Supplemental Movie 1). This exacerbated neutrophil recruitment in NASH larvae was not  
324 accompanied by macrophage infiltration, with macrophages being recruited to tailfin injury at  
325 same level as in control larvae (Supplemental Movie 1). Moreover, analysis of neutrophil tracking  
326 for 8 hours, showed that neutrophils migrate at a higher speed at the wound and vicinity in NASH  
327 larvae (Fig. 4 A-B). Interestingly, at this developmental stage a vast majority of the neutrophils  
328 that arrive to the tailfin area use vessels, particularly in NASH larvae. We could observe this in  
329 the time-lapse movies, by detecting the accumulation of neutrophils at the artery-vessel loop (Fig.  
330 3; Supplemental Movie 1). Collectively, our findings show that cholesterol surplus and presence  
331 of NASH promotes an exacerbated neutrophil response to tissue injury, supporting the idea that  
332 western type diets and associated pathologies promote alterations on neutrophil biology.

333

334 **Resolution of inflammation in tissue injury is impaired in NASH.**

335 Resolution of inflammation is a critical phase in the inflammatory response, where neutrophil  
336 clearance from the injured area needs to occur so that the tissue repair machinery can be fully

337 activated. Once resolution of inflammation is dysregulated, progression from acute to chronic  
338 inflammation occurs and tissue damage and disease results<sup>31</sup>. The kinetics of the recruitment curve  
339 from time-lapse microscopy were different in NASH larvae compared to control suggesting that  
340 neutrophil clearance from the wound is delayed and therefore possibly impacting resolution of  
341 inflammation (Fig. 3B). To test whether resolution phase is affected in NASH, we quantified the  
342 number of neutrophils at the tailfin wounded area at 4 hpw, the peak of neutrophil recruitment,  
343 and later at 24 hpw, when resolution phase is expected to have started in larvae fed with HCD  
344 versus normal diet<sup>16, 32-34</sup>. As expected, we observed a reduction in the number of neutrophils at  
345 the wound from 4 to 24 hpw in control larvae fed with normal diet (Fig. 4 C-D). However, in  
346 NASH larvae fed with HCD the number of neutrophils at the injury site were almost the same at  
347 4 and 24 hpw (Fig. 4 C-D). Collectively, these findings show that NASH impairs resolution of  
348 inflammation in tissue injury.

349

### 350 **Neutrophils from NASH larvae have increased ROS production at injury sites.**

351 Next, we decided to evaluate if exacerbated neutrophil chemotaxis and impaired resolution of  
352 inflammation were associated with increased ROS production in neutrophils at the tissue injury  
353 site. To do so we stained larvae expressing a neutrophil cytoplasmic marker, Tg(mpx:mCherry),  
354 with CellROX Deep Green to label intracellular H<sub>2</sub>O<sub>2</sub>, and performed colocalization analysis on  
355 confocal microscopy images of the amputated tailfin (Fig. 5). We observed that larvae fed with  
356 HCD have a significantly higher number of neutrophils at the wound site that generate ROS at 4  
357 hpw, as shown by the quantification of the number of colocalized voxels between neutrophil  
358 signals (mCherry) and CellROX (Deep Green) (Fig. 5 A and B). In addition, we also found that  
359 neutrophils from larvae fed with HCD generate higher amount of H<sub>2</sub>O<sub>2</sub>, as shown by quantification

360 of the percentage of mCherry/Deep Green signal that colocalizes (Fig. 5 C). Collectively, these  
361 results indicate that NASH enhances the ability of neutrophils to produce a higher amount of ROS  
362 at inflammatory sites, suggesting that NASH induces neutrophil priming.

363

#### 364 **Neutrophils reverse migrate from liver area to tailfin injury.**

365 Clearance of neutrophils from inflamed areas is achieved by multiple fates, such as apoptosis,  
366 phagocytosis, or reverse migration<sup>35</sup>. Neutrophil reverse migration is a conserved mechanism  
367 among human, murine and zebrafish. In a mice model of sterile liver injury, a subpopulation of  
368 neutrophils leaves the injury site by reverse migration and re-enter the circulation REF. Next, we  
369 decided to test whether neutrophils infiltrated at the NASH liver<sup>14, 15</sup> can reverse migrate and  
370 respond to the “*secondary*” inflammatory stimulus, the tailfin injury. For such, we performed  
371 photoconversion of neutrophils at the liver area (Suppl. Fig. 5) making use of a transgenic line  
372 [Tg(mpx:dendra)] with neutrophils expressing the photoconvertible protein Dendra. Immediately  
373 after photoconversion, a tail fin amputation was performed followed by non-invasive time-lapse  
374 confocal microscopy imaging from 1-6 hpw. We observed that larvae exposed to HCD had a higher  
375 number and higher percentage of photoconverted neutrophils at the wound from 1-6 hpw (Fig. 6).  
376 This data suggests that neutrophils from NASH liver can undergo reverse migration and massively  
377 respond to a “*secondary*” inflammatory stimulus. Such effect was also observed in our whole-  
378 animal time-lapse movies (Supplemental Movie 3).

379

380 **Neutrophil exacerbated response to tissue injury is alleviated by NASH pharmacological**  
381 **intervention.**

382 In our previous studies, metformin treatment reduced steatosis, and overall inflammation at the  
383 liver that could be observed by reduced neutrophil infiltration<sup>14</sup>. In addition, tumor necrosis factor-  
384 alpha (TNF $\alpha$ ) has been reported as a main inflammatory molecule upregulated in NASH, as we  
385 have shown previously shown in our NASH model<sup>14</sup>. Inhibition of TNF $\alpha$  secretion with  
386 pentoxifylline<sup>36</sup>, was found to be effective on improving liver function and histological changes  
387 in patients with NASH To test whether pharmacological treatment of NASH with metformin and  
388 pentoxifylline could revert the SCI as well the exacerbated neutrophil response, we first let larvae  
389 to develop NASH and SCI by feeding larvae from 5 days post fertilization (dpf) to 9 dpf with HCD  
390 (Suppl. Fig. 2), followed by a 2-day treatment (10 dpf- 12 dpf) with metformin or pentoxifylline  
391 to revert this effect. Drug treatments were removed and replaced by E3 at least 16h before any  
392 intervention in larvae to avoid direct effect on neutrophil recruitment to tailfin injury. We observed  
393 that both these drugs partially rescued diet-induced SCI and decreased the hyper-responsiveness  
394 of neutrophils to tailfin injury (Fig. 7), suggesting that indeed NASH and associated liver  
395 inflammation contributes to priming of neutrophils and that NASH-pharmacological intervention  
396 can alleviate the adverse effect on exacerbated neutrophilic inflammation.

397

398 **Discussion:**

399 Nonalcoholic fatty liver disease (NAFLD), and its more aggressive inflammatory form,  
400 nonalcoholic steatohepatitis (NASH), are associated with metainflammation<sup>37, 38</sup> and increased  
401 activation of neutrophils<sup>39</sup>. How exactly systemic neutrophilic inflammation is altered by NASH  
402 and associated metainflammation and what mechanisms sustain neutrophil hyperactive response  
403 are not fully understood. A major limitation in the field is the lack of vertebrate animal models of  
404 NASH amenable to whole-animal non-invasive live-imaging of immune cell recruitment and  
405 function that recapitulate the inherent cellular and molecular complexity of establishing  
406 inflammatory responses in the context of metabolic syndrome and metainflammation. The  
407 transparency and easiness to perform live imaging makes the zebrafish the only vertebrate system  
408 that allows the visualization and study of neutrophils and inflammatory response non-invasively  
409 in a whole-animal context<sup>13</sup>. Here making use of a diet induced-NASH zebrafish model we report  
410 that neutrophil response to tissue injury is drastically exacerbated with neutrophils from the liver  
411 undergoing massive reverse migration upon sensing a “secondary” inflammatory stimulus,  
412 functioning as a main source of primed neutrophils that fuels neutrophilic inflammatory response  
413 to injury sites. We also probe that pharmacological treatment of NASH reverted the observed  
414 exacerbated neutrophil response to tissue injury. Our work shows that zebrafish models provide  
415 the perfect platform to study the pathophysiological mechanisms involved on how diet, NASH and  
416 associated metainflammation impact neutrophils and inflammatory response. Overall, our findings  
417 support the idea that under NASH conditions, the liver serves as a source of primed neutrophils  
418 that reverse migrate and respond massively to “secondary” inflammatory triggers, identifying a  
419 potential therapeutic target to reduce the adverse complications observed in patients with NASH  
420 and associated comorbidities due to hyperactive neutrophil response.

421 The liver is a vital organ with high regenerative capacity that plays more than 500 functions, with  
422 a central role in metabolic activities, nutrient storage, detoxification<sup>40</sup>. The liver is also the stage  
423 for complex immunological actions; being exposed to dietary and commensal bacterial products  
424 from the gut with inflammatory potential that routinely challenge the diverse population of resident  
425 immune cells. Interestingly, the liver not just facilitates the removal and degradation of  
426 immunogenic molecules from the gut<sup>40</sup>, but it is also target of inflammatory macromolecules from  
427 the brain via a drainage mechanism that results in macrophage and neutrophil infiltration<sup>41</sup>. To  
428 exert its functions, the liver tolerates those challenges but at same time triggers homeostatic  
429 inflammation, a process that is continuously being activated and resolved to support tissue  
430 regeneration and preserve tissue and organ homeostasis<sup>40</sup>. Once liver homeostatic inflammation is  
431 dysregulated, pathology and organ damage occur<sup>40</sup>. The consumption of high cholesterol diet can  
432 be one of the factors that disrupts homeostatic inflammation; indeed, cholesterol surplus leads to  
433 polarization of Kupfer Cells (the resident macrophage population) into a M4-like phenotype that  
434 promotes recruitment of neutrophils<sup>11</sup>. Without the possibility to shut down and resolve  
435 inflammation, chronic liver inflammation is established, which gives raise to NASH that  
436 eventually develops to fibrosis and cancer. We and others have shown that zebrafish larvae develop  
437 NASH after exposure to high cholesterol diet (HCD)<sup>14,15,26,42</sup>. Systemic inflammation and overall  
438 immune imbalances, both at cellular and cytokine levels, are associated with NASH and other  
439 metabolic diseases<sup>4,43</sup>. We found that NASH larvae develop a chronic systemic low-grade of  
440 inflammation characterized by infiltration of neutrophils and macrophages to different tissues and  
441 an imbalance in the expression of several pro-inflammatory cytokines. In addition, we observed  
442 enhanced proliferation at hematopoietic niches and number of hematopoietic stem cells, which  
443 explained the increased number of neutrophils and macrophages in NASH larvae. NASH can

444 contribute to establishment of such chronic low-grade systemic inflammation, which ultimately  
445 triggers myelopoiesis, through the systemic release of several markers of inflammation, oxidative  
446 stress, and of procoagulant factors. Our observations phenotypically recapitulate the systemic  
447 impact of NASH found in humans and murine models<sup>43, 44</sup>, providing a basis for the use of the  
448 NASH zebrafish model on evaluating the impact of this pathology on neutrophil response to  
449 “secondary” inflammatory triggers.

450 One of the best characterized models of live neutrophil recruitment is the zebrafish tailfin injury  
451 model, which triggers a leukocyte immune response that precisely mimics the kinetics observed  
452 in mammalian acute inflammatory responses<sup>13, 16, 19, 32, 45-55</sup>. We found that neutrophil response to  
453 tissue injury is exacerbated in presence of NASH and associated metainflammation, with a  
454 substantial number of neutrophils being recruited (2.8 times more) after exposure to HCD.  
455 Similarly, exacerbated neuroinflammation and intracerebral hemorrhage injury was previously  
456 observed in a mouse model of NAFLD<sup>56</sup>. Moreover, recruited neutrophils to tissue injury migrate  
457 at a higher speed in NASH larvae. It has been reported in multiple models that cholesterol surplus  
458 increases adherence and decreases rolling velocity of neutrophils. As far as we know, this is the  
459 first time a study reports a faster speed of neutrophils migrating in an injured tissue and vicinity  
460 under NASH conditions. Increased neutrophil speed at injury sites could seriously impact the local  
461 inflammatory response interfering with neutrophil recognition of tissue injury site. The increased  
462 neutrophil speed observed in NASH and associated metainflammation, could be a result of low  
463 production of chemokines responsible for slowing-down neutrophils at injury sites, as we and  
464 *Sarris et al* have shown previously with CXCL8<sup>16, 57</sup>, due to cell exhaustion or tolerance. Another  
465 possible explanation is that neutrophils from NASH larvae might have been through mechanisms  
466 of receptor desensitization, internalization, or degradation<sup>58</sup> triggered by the chronic inflammation

467 found in this condition. Such alterations of chemoattractant receptors would hamper neutrophils  
468 from recognizing the high levels of chemoattractants such as CXCL8 that indicate the localization  
469 of injury sites and allow neutrophils to engage in local inflammatory response.

470 Neutrophils can modify their functional responses after being exposed to multiple factors, through  
471 the process named neutrophil priming<sup>59</sup>. NASH liver is a chronic inflammatory microenvironment  
472 that can lead to neutrophil priming. In NASH and hyperlipidemic patients, peripheral  
473 polymorphonuclear leukocytes (PMNL) are primed and able to produce increased amounts of  
474 ROS<sup>60, 61</sup>. We observed in NASH larvae that neutrophils recruited to the tissue injury produce  
475 higher amounts of reactive oxygen species (ROS) at the injury site. Increased ROS production can  
476 cause a progressive oxidative damage, sustain inflammation, and delay resolution. Therefore, the  
477 increased ROS production levels observed in NASH neutrophils at the injury site could be one  
478 contributing factor for the delayed resolution that we observed. In addition, we found that nearly  
479 50% of the neutrophils recruited to the tailfin injury have NASH liver as origin. Interestingly,  
480 pharmacological treatment of NASH with Metformin and Pentoxifylline reverted the systemic  
481 chronic inflammation and the exacerbated neutrophil recruitment to the tissue injury. Overall,  
482 these findings make us speculate that NASH liver is an active source of primed neutrophils that  
483 massively reverse migrate towards “secondary” inflammatory stimulus such as tissue injury;  
484 therefore, the neutrophil pool at NASH liver might be a potential target to reduce the adverse  
485 effects caused by dysfunctional and hyperactive neutrophil response observed in patients with  
486 NASH and associated comorbidities that often lead to disability and death.

487 Metabolic syndrome and associated inflammation is a complex interplay of signals among  
488 different tissues and organs that could all be contributing to the exacerbated neutrophilic  
489 inflammation observed in NASH larvae. Our study did not allow us to separate the effect of NASH



490 from systemic chronic inflammation. It is possible that under the systemic chronic inflammation  
491 conditions, increased production of ROS and other proinflammatory signals from epithelia cells  
492 or immune resident cells like macrophages, might be contributing to the exacerbated neutrophil  
493 response found in NASH larvae. In our study, we observed infiltration of neutrophils to multiple  
494 tissues and organs and a drastic neutrophil depletion from hematopoietic tissues. We found that  
495 just about 50% of neutrophils at tailfin injury have reverse migrated from the liver, it is plausible  
496 to consider that other tissues and organs might also contribute to the impaired neutrophil response  
497 in NASH via similar mechanism. Additionally, it is unclear at what extension the cholesterol diet  
498 is impacting neutrophil biology directly. Lipids accumulate in leukocytes of rats fed with different  
499 atherogenic diets<sup>62</sup>. Neutrophil *ex vivo* treatment with for example cholesterol, low density  
500 lipoprotein or oxysterols support a direct role of cholesterol surplus on neutrophil chemotaxis,  
501 adhesion, function and fate<sup>63-65</sup>. In this study we did not explore such effect to determine at what  
502 extent the changes in neutrophil recruitment are cell autonomous or not. Finally, the metabolic and  
503 epigenetic rewiring of myeloid progenitor cells by diet drives trained immunity and sustains hyper  
504 responsiveness of the innate immune system<sup>27</sup>. Furthermore, different tissues and inflammation  
505 induce proteomic, transcriptomic and epigenomic reprogramming of neutrophils<sup>66</sup> REFS.  
506 Therefore, another important question that this study raises is at what cellular stage (e.g.,  
507 progenitor level, immature, or mature), where (e.g., hematopoietic tissues, liver or other tissues  
508 and organs) and how neutrophils are being altered in NASH. Future studies will need to be  
509 performed to specifically address these questions and the diet-induce NASH zebrafish model is a  
510 unique model to visualize and investigate the cellular and molecular mechanisms that drive  
511 neutrophil hyperactive response in NASH.

512 In summary, our data suggest that NASH exacerbates neutrophilic inflammation to tissue injury  
513 probably via neutrophil priming at the liver, which can further undergo reverse migration and  
514 respond to secondary inflammatory triggers. In the future, reverse migration of neutrophils from  
515 the liver might be an important mechanism to target to diminish neutrophil response, improve  
516 prognosis, and reduce disability and death in patients with NASH.

517

518 **Acknowledgments:** We thank to Dr. Anna Huttenlocher for laboratorial and financial support  
519 while conducting experimental work in UW-Madison and Dr. Veronika Milkosvki for all the  
520 critical comments and support given during the development of this work.

521

522 **Figures Legends:**

523 **Figure 1: NASH larvae have enhanced myelopoiesis and systemic chronic inflammation. (A)**

524 Representative maximum intensity projections of 13 dpf larvae Tg(mpeg:H2B-GFP/lyzC:H2B-  
525 mCherry) fed with normal diet (ND) and high cholesterol diet (HCD); (i and i') Higher  
526 magnification of the caudal hematopoietic tissue (CHT) dotted area. (ii and ii') Higher  
527 magnification of the head and gut dotted area. **(B-C)** Quantification of total number of neutrophils  
528 **(B)** and macrophages **(C)** in whole-larvae (ND n=20, HCD n=35). **(D)** Chi-square graphs showing  
529 percentage of larvae with Systemic Chronic Inflammation (SCI) (ND n=20, HCD n=35). **(E)** Chi-  
530 square graphs showing percentage of larvae with neutrophil CHT depletion (ND n=20, HCD  
531 n=35). Data are from at least three independent experimental replicates. EM-Means analysis in R,  
532 was performed in total number of neutrophil and macrophage quantifications **(B and C)** and Chi-  
533 square test was used to analyze SCI and Neutrophil CHT depletion scorings **(D and E)**. Scatter  
534 plots with bars shown mean  $\pm$ SEM, each dot represents one larva, significant p values are shown  
535 in each graph. Scale bar = 200  $\mu$ m.

536

537 **Figure 2: Proliferation in hematopoietic tissues is increased in NASH larvae. (A)**

538 Representative maximum intensity projections of 13 dpf larvae fed with normal diet (ND) and  
539 high cholesterol diet (HCD) incubated with EDU. **(B)** Quantification of number of EDU positive  
540 cells in whole larvae (ND n=16, HCD n=22). **(C)** Quantification of number of EDU positive cells  
541 at different hematopoietic tissues, Caudal Hematopoietic Tissue (CHT), Kidney and Thymus (ND  
542 n=16, HCD n=22). All data plotted are from at least two independent experimental replicates. EM-  
543 Means analysis in R was performed in all data. Scatter plots with bars shown mean  $\pm$ SEM, each  
544 dot represents one larva, significant p values are shown in each graph. Scale bar= 200 $\mu$ m.

545 **Figure 3: Neutrophil response to tissue injury is enhanced in NASH larvae.** (A) Representative  
546 maximum intensity projections of 13 dpf larvae Tg(lyzC:H2B-mCherry) fed with normal diet  
547 (ND) and high cholesterol diet (HCD). Images were extracted from time-lapse movies (B)  
548 Quantification of number of neutrophils recruited to wound at 1-, 2-, 4-, 6- and 8- hours-post  
549 wounding [(hpw); (ND n=16, HCD n=17)]. Data are from at least three independent experimental  
550 replicates. Two-way-ANOVA analysis with Bonferroni's multiple comparisons test. Solid line  
551 shows mean  $\pm$ SEM, significant p values are shown in each timepoint. Each dashed line in graph  
552 represents neutrophil recruitment to wound area in one larva followed from 1-8hpw. Scale bar=  
553 200 $\mu$ m.

554 **Figure 4: Resolution of inflammation is delayed in NASH larvae.** (A) Representative maximum  
555 intensity projections of tailfin wounds at 4 and 24 hours-post-wounding (hpw) of 13 dpf larvae  
556 Tg(lyzC:H2B-mCherry) fed with normal diet (ND) and high cholesterol diet (HCD). (B)  
557 Quantification of number of neutrophils recruited to wound at 4 and 24 hours post wounding  
558 [(hpw); (ND 4hpw n=36, ND 24hpw n=26, HCD 4hpw n=40, HCD 24hpw n=32)]. Data are from  
559 at least three independent experimental replicates. EM-Means analysis in R was performed. Scatter  
560 plots with bars shown mean  $\pm$ SEM, each dot represents one larva, significant p values are shown  
561 in each graph. Scale bar= 200 $\mu$ m.

562 **Figure 5: NASH enhances neutrophil ROS production at injury sites.** (A) Representative  
563 maximum intensity projections of tailfin wounds at 4hours-post-wounding (hpw) of 13 dpf  
564 Tg(mpx:mCherry) larvae fed with normal diet (ND) and high cholesterol diet (HCD) and  
565 incubated with CellROX. Scale bar= 50  $\mu$ m. Higher magnification of dotted area at tailfin wound.  
566 Scale bar = 20  $\mu$ m. (B) Quantification of number of colocalized voxels. (C) Quantification of the

567 % of dataset colocalized (ND n=24, HCD n=37). Data are from at least three independent  
568 experimental replicates. EM-Means analysis in R was performed. Scatter plots with bars shown  
569 mean  $\pm$ SEM, each dot represents one larva, significant p values are shown in each graph.

570 **Figure 6: Neutrophils undergo reverse migration from inflamed NASH-liver to tailfin injury.**

571 **(A)** Representative maximum intensity projections of 13 dpf larvae Tg(mpx:Dendra) fed with  
572 normal diet (ND) and high cholesterol diet (HCD). Images extracted from time-lapse movies. **(B)**  
573 Quantification of number of photoconverted neutrophils recruited to wound area at 1-, 2-, 4- and  
574 6-hours post wounding [(hpw); (ND n=15, HCD n=20)]. **(C)** Quantification of percentage of  
575 photo-converted neutrophils recruited to wound area at 1-, 2-, 4- and 6-hpw (ND n=15, HCD  
576 n=20). Data are from at least three independent experimental replicates. Two-way-ANOVA  
577 analysis with Bonferroni's multiple comparisons test. Solid line shows mean  $\pm$ SEM, significant p  
578 values are shown in each timepoint. Each dashed line in graph represents neutrophil recruitment  
579 to wound area in one larva followed from 1-6hpw. Scale bar= 200 $\mu$ m.

580 **Figure 7: Pharmacological treatment with Metformin and Pentoxifylline alleviates NASH**

581 **impact on neutrophilic inflammation.** **(A)** Representative maximum intensity projections of 13  
582 dpf larvae Tg(mpeg:H2B-GFP/lyzC:H2B-mCherry) fed with normal diet (ND) and high  
583 cholesterol diet (HCD) treated with DMSO, Metformin (Met) or Pentoxifylline (PTX). **(B)** Chi-  
584 square graphs showing percentage of larvae with Systemic Chronic Inflammation (SCI) (HCD  
585 n=32, HCD+Met n=19, HCD+PTX n=18). **(C)** Representative maximum intensity projections of  
586 tailfin wounds at 4 hours-post-wounding (hpw) of 13 dpf larvae Tg(lyzC:H2B-mCherry) fed with  
587 ND and HCD and treated with DMSO, Metformin (Met) or Pentoxifylline (PTX). **(D)**  
588 Quantification of number of neutrophils recruited to wound area at 4hpw (HCD n=63, HCD+Met

589 n=45, HCD+PTX n=25). Data are from at least three independent experimental replicates. EM-  
590 Means analysis in R, was performed in quantification of number of neutrophils at wound (B) and  
591 Chi-square test was used to analyze SCI and Neutrophil CHT depletion scorings (D and E). Scatter  
592 plots with bars shown mean  $\pm$ SEM, each dot represents one larva, significant p values are shown  
593 in each graph. Scale bar = 200  $\mu$ m.

594

595

596

597

598

599 **References:**

- 600 1. Estes, C., Razavi, H., Loomba, R., Younossi, Z. & Sanyal, A.J. Modeling the epidemic of  
601 nonalcoholic fatty liver disease demonstrates an exponential increase in burden of disease.  
602 *Hepatology* **67**, 123-133 (2018).
- 603 2. Tsochatzis, E.A. & Newsome, P.N. Non-alcoholic fatty liver disease and the interface between  
604 primary and secondary care. *Lancet Gastroenterol Hepatol* **3**, 509-517 (2018).
- 605 3. Wesolowski, S.R., Kasmi, K.C., Jonscher, K.R. & Friedman, J.E. Developmental origins of NAFLD: a  
606 womb with a clue. *Nature reviews. Gastroenterology & hepatology* **14**, 81-96 (2017).
- 607 4. Paquissi, F.C. Immune Imbalances in Non-Alcoholic Fatty Liver Disease: From General  
608 Biomarkers and Neutrophils to Interleukin-17 Axis Activation and New Therapeutic Targets.  
609 *Front Immunol* **7**, 490 (2016).
- 610 5. Adenote, A. *et al.* NAFLD and Infection, a Nuanced Relationship. *Can J Gastroenterol Hepatol*  
611 **2021**, 5556354 (2021).
- 612 6. Rezasoltani, S., Hatami, B., Yadegar, A., Asadzadeh Aghdai, H. & Zali, M.R. How Patients With  
613 Chronic Liver Diseases Succeed to Deal With COVID-19? *Front Med (Lausanne)* **7**, 398 (2020).
- 614 7. Portincasa, P., Krawczyk, M., Smyk, W., Lammert, F. & Di Ciaula, A. COVID-19 and non-alcoholic  
615 fatty liver disease: Two intersecting pandemics. *European journal of clinical investigation* **50**,  
616 e13338 (2020).
- 617 8. Nemeth, T., Sperandio, M. & Mocsai, A. Neutrophils as emerging therapeutic targets. *Nat Rev*  
618 *Drug Discov* **19**, 253-275 (2020).
- 619 9. Soehnlein, O., Steffens, S., Hidalgo, A. & Weber, C. Neutrophils as protagonists and targets in  
620 chronic inflammation. *Nat Rev Immunol* **17**, 248-261 (2017).
- 621 10. Antonucci, L. *et al.* Circulating Neutrophils of Nonalcoholic Steatohepatitis Patients Show an  
622 Activated Phenotype and Suppress T Lymphocytes Activity. *J Immunol Res* **2020**, 4570219  
623 (2020).
- 624 11. Maretti-Mira, A.C., Golden-Mason, L., Salomon, M.P., Kaplan, M.J. & Rosen, H.R. Cholesterol-  
625 Induced M4-Like Macrophages Recruit Neutrophils and Induce NETosis. *Front Immunol* **12**,  
626 671073 (2021).
- 627 12. Zhao, X. *et al.* Neutrophils undergo switch of apoptosis to NETosis during murine fatty liver  
628 injury via S1P receptor 2 signaling. *Cell Death Dis* **11**, 379 (2020).
- 629 13. Henry, K.M., Loynes, C.A., Whyte, M.K. & Renshaw, S.A. Zebrafish as a model for the study of  
630 neutrophil biology. *J Leukoc Biol* **94**, 633-642 (2013).
- 631 14. de Oliveira, S. *et al.* Metformin modulates innate immune-mediated inflammation and early  
632 progression of NAFLD-associated hepatocellular carcinoma in zebrafish. *J Hepatol* **70**, 710-721  
633 (2019).
- 634 15. Progzatky, F. *et al.* Dietary cholesterol directly induces acute inflammasome-dependent  
635 intestinal inflammation. *Nature communications* **5**, 5864 (2014).
- 636 16. de Oliveira, S. *et al.* Cxcl8 (IL-8) mediates neutrophil recruitment and behavior in the zebrafish  
637 inflammatory response. *J Immunol* **190**, 4349-4359 (2013).
- 638 17. Yoo, S.K. *et al.* Differential regulation of protrusion and polarity by PI3K during neutrophil  
639 motility in live zebrafish. *Developmental cell* **18**, 226-236 (2010).
- 640 18. Michael, C., Martinez-Navarro, F.J. & de Oliveira, S. Analysis of Liver Microenvironment during  
641 Early Progression of Non-Alcoholic Fatty Liver Disease-Associated Hepatocellular Carcinoma in  
642 Zebrafish. *J Vis Exp* (2021).
- 643 19. Miskolci, V. *et al.* Distinct inflammatory and wound healing responses to complex caudal fin  
644 injuries of larval zebrafish. *Elife* **8** (2019).

- 645 20. Yoo, S.K. *et al.* The role of microtubules in neutrophil polarity and migration in live zebrafish.  
646 *Journal of cell science* **125**, 5702-5710 (2012).
- 647 21. Vincent, W.J., Freisinger, C.M., Lam, P.Y., Huttenlocher, A. & Sauer, J.D. Macrophages mediate  
648 flagellin induced inflammasome activation and host defense in zebrafish. *Cellular microbiology*  
649 **18**, 591-604 (2016).
- 650 22. Barros-Becker, F., Lam, P.Y., Fisher, R. & Huttenlocher, A. Live imaging reveals distinct modes of  
651 neutrophil and macrophage migration within interstitial tissues. *Journal of cell science* **130**,  
652 3801-3808 (2017).
- 653 23. Tauzin, S., Starnes, T.W., Becker, F.B., Lam, P.Y. & Huttenlocher, A. Redox and Src family kinase  
654 signaling control leukocyte wound attraction and neutrophil reverse migration. *The Journal of*  
655 *cell biology* **207**, 589-598 (2014).
- 656 24. Huemer, K. *et al.* zWEDGI: Wounding and Entrapment Device for Imaging Live Zebrafish Larvae.  
657 *Zebrafish* **14**, 42-50 (2017).
- 658 25. de Oliveira, S., Houseright, R.A., Korte, B.G. & Huttenlocher, A. DnaJ-PKAc fusion induces liver  
659 inflammation in a zebrafish model of fibrolamellar carcinoma. *Dis Model Mech* **13** (2020).
- 660 26. Ma, J. *et al.* A Comprehensive Study of High Cholesterol Diet-Induced Larval Zebrafish Model: A  
661 Short-Time In Vivo Screening Method for Non-Alcoholic Fatty Liver Disease Drugs. *Int J Biol Sci*  
662 **15**, 973-983 (2019).
- 663 27. Christ, A. *et al.* Western Diet Triggers NLRP3-Dependent Innate Immune Reprogramming. *Cell*  
664 **172**, 162-175 e114 (2018).
- 665 28. de Pater, E. & Trompouki, E. Bloody Zebrafish: Novel Methods in Normal and Malignant  
666 Hematopoiesis. *Front Cell Dev Biol* **6**, 124 (2018).
- 667 29. Christ, A., Lauterbach, M. & Latz, E. Western Diet and the Immune System: An Inflammatory  
668 Connection. *Immunity* **51**, 794-811 (2019).
- 669 30. Palsson-McDermott, E.M. & O'Neill, L.A.J. Targeting immunometabolism as an anti-  
670 inflammatory strategy. *Cell research* **30**, 300-314 (2020).
- 671 31. Sugimoto, M.A., Sousa, L.P., Pinho, V., Perretti, M. & Teixeira, M.M. Resolution of Inflammation:  
672 What Controls Its Onset? *Front Immunol* **7**, 160 (2016).
- 673 32. Mathias, J.R. *et al.* Resolution of inflammation by retrograde chemotaxis of neutrophils in  
674 transgenic zebrafish. *Journal of leukocyte biology* **80**, 1281-1288 (2006).
- 675 33. Elks, P.M. *et al.* Activation of hypoxia-inducible factor-1alpha (Hif-1alpha) delays inflammation  
676 resolution by reducing neutrophil apoptosis and reverse migration in a zebrafish inflammation  
677 model. *Blood* **118**, 712-722 (2011).
- 678 34. Starnes, T.W. & Huttenlocher, A. Neutrophil reverse migration becomes transparent with  
679 zebrafish. *Advances in hematology* **2012**, 398640 (2012).
- 680 35. de Oliveira, S., Rosowski, E.E. & Huttenlocher, A. Neutrophil migration in infection and wound  
681 repair: going forward in reverse. *Nat Rev Immunol* **16**, 378-391 (2016).
- 682 36. Du, J., Ma, Y.Y., Yu, C.H. & Li, Y.M. Effects of pentoxifylline on nonalcoholic fatty liver disease: a  
683 meta-analysis. *World journal of gastroenterology : WJG* **20**, 569-577 (2014).
- 684 37. Farrell, G.C., Haczeyni, F. & Chitturi, S. Pathogenesis of NASH: How Metabolic Complications of  
685 Overnutrition Favour Lipotoxicity and Pro-Inflammatory Fatty Liver Disease. *Adv Exp Med Biol*  
686 **1061**, 19-44 (2018).
- 687 38. Marra, F. & Svegliati-Baroni, G. Lipotoxicity and the gut-liver axis in NASH pathogenesis. *J*  
688 *Hepatol* **68**, 280-295 (2018).
- 689 39. Liu, K., Wang, F.S. & Xu, R. Neutrophils in liver diseases: pathogenesis and therapeutic targets.  
690 *Cell Mol Immunol* **18**, 38-44 (2021).
- 691 40. Robinson, M.W., Harmon, C. & O'Farrelly, C. Liver immunology and its role in inflammation and  
692 homeostasis. *Cell Mol Immunol* **13**, 267-276 (2016).



- 693 41. Yang, L. *et al.* Drainage of inflammatory macromolecules from the brain to periphery targets the  
694 liver for macrophage infiltration. *Elife* **9** (2020).
- 695 42. Asaoka, Y., Terai, S., Sakaida, I. & Nishina, H. The expanding role of fish models in understanding  
696 non-alcoholic fatty liver disease. *Dis Model Mech* **6**, 905-914 (2013).
- 697 43. Haukeland, J.W. *et al.* Systemic inflammation in nonalcoholic fatty liver disease is characterized  
698 by elevated levels of CCL2. *J Hepatol* **44**, 1167-1174 (2006).
- 699 44. Bijnen, M. *et al.* Adipose tissue macrophages induce hepatic neutrophil recruitment and  
700 macrophage accumulation in mice. *Gut* (2017).
- 701 45. Isles, H.M. *et al.* The CXCL12/CXCR4 Signaling Axis Retains Neutrophils at Inflammatory Sites in  
702 Zebrafish. *Front Immunol* **10**, 1784 (2019).
- 703 46. Paredes-Zuniga, S. *et al.* CXCL12a/CXCR4b acts to retain neutrophils in caudal hematopoietic  
704 tissue and to antagonize recruitment to an injury site in the zebrafish larva. *Immunogenetics* **69**,  
705 341-349 (2017).
- 706 47. Powell, D. *et al.* Chemokine Signaling and the Regulation of Bidirectional Leukocyte Migration in  
707 Interstitial Tissues. *Cell Rep* **19**, 1572-1585 (2017).
- 708 48. Hoodless, L.J. *et al.* Genetic and pharmacological inhibition of CDK9 drives neutrophil apoptosis  
709 to resolve inflammation in zebrafish in vivo. *Sci Rep* **5**, 36980 (2016).
- 710 49. Robertson, A.L. *et al.* A zebrafish compound screen reveals modulation of neutrophil reverse  
711 migration as an anti-inflammatory mechanism. *Sci Transl Med* **6**, 225ra229 (2014).
- 712 50. de Oliveira, S. *et al.* ATP modulates acute inflammation in vivo through dual oxidase 1-derived  
713 H<sub>2</sub>O<sub>2</sub> production and NF- $\kappa$ B activation. *J Immunol* **192**, 5710-5719 (2014).
- 714 51. Ogryzko, N.V. *et al.* Zebrafish tissue injury causes upregulation of interleukin-1 and caspase-  
715 dependent amplification of the inflammatory response. *Dis Model Mech* **7**, 259-264 (2014).
- 716 52. Yan, B. *et al.* IL-1 $\beta$  and reactive oxygen species differentially regulate neutrophil directional  
717 migration and Basal random motility in a zebrafish injury-induced inflammation model. *J*  
718 *Immunol* **192**, 5998-6008 (2014).
- 719 53. Yoo, S.K., Starnes, T.W., Deng, Q. & Huttenlocher, A. Lyn is a redox sensor that mediates  
720 leukocyte wound attraction in vivo. *Nature* **480**, 109-112 (2011).
- 721 54. Niethammer, P., Grabher, C., Look, A.T. & Mitchison, T.J. A tissue-scale gradient of hydrogen  
722 peroxide mediates rapid wound detection in zebrafish. *Nature* **459**, 996-999 (2009).
- 723 55. Renshaw, S.A., Loynes, C.A., Elworthy, S., Ingham, P.W. & Whyte, M.K. Modeling inflammation in  
724 the zebrafish: how a fish can help us understand lung disease. *Exp Lung Res* **33**, 549-554 (2007).
- 725 56. Li, X. *et al.* Dyslipidemic Diet Induces Mobilization of Peripheral Neutrophils and Monocytes That  
726 Exacerbate Hemorrhagic Brain Injury and Neuroinflammation. *Front Cell Neurosci* **14**, 154  
727 (2020).
- 728 57. Sarris, M. *et al.* Inflammatory chemokines direct and restrict leukocyte migration within live  
729 tissues as glycan-bound gradients. *Curr Biol* **22**, 2375-2382 (2012).
- 730 58. Lammermann, T. & Kastenmuller, W. Concepts of GPCR-controlled navigation in the immune  
731 system. *Immunol Rev* **289**, 205-231 (2019).
- 732 59. Summers, C. *et al.* Neutrophil kinetics in health and disease. *Trends Immunol* **31**, 318-324 (2010).
- 733 60. Farah, R., Shurtz-Swirski, R. & Dorlechter, F. Primed polymorphonuclear leukocytes constitute a  
734 possible link between inflammation and oxidative stress in hyperlipidemic patients: effect of  
735 statins. *Minerva Cardioangiol* **58**, 175-181 (2010).
- 736 61. Araujo, F.B., Barbosa, D.S., Hsin, C.Y., Maranhao, R.C. & Abdalla, D.S. Evaluation of oxidative  
737 stress in patients with hyperlipidemia. *Atherosclerosis* **117**, 61-71 (1995).
- 738 62. Suzuki, M. & O'Neal, R.M. Accumulation of Lipids in the Leukocytes of Rats Fed Atherogenic  
739 Diets. *Journal of lipid research* **5**, 624-627 (1964).

- 740 63. Sedgwick, J.B., Hwang, Y.S., Gerbyshak, H.A., Kita, H. & Busse, W.W. Oxidized low-density  
741 lipoprotein activates migration and degranulation of human granulocytes. *Am J Respir Cell Mol*  
742 *Biol* **29**, 702-709 (2003).
- 743 64. Lai, X.F. *et al.* Hypercholesterolemia increases the production of leukotriene B4 in neutrophils by  
744 enhancing the nuclear localization of 5-lipoxygenase. *Cell Physiol Biochem* **34**, 1723-1732 (2014).
- 745 65. Tall, A.R. & Westerterp, M. Inflammasomes, neutrophil extracellular traps, and cholesterol.  
746 *Journal of lipid research* **60**, 721-727 (2019).
- 747 66. Xie, X. *et al.* Single-cell transcriptome profiling reveals neutrophil heterogeneity in homeostasis  
748 and infection. *Nature immunology* **21**, 1119-1133 (2020).

749

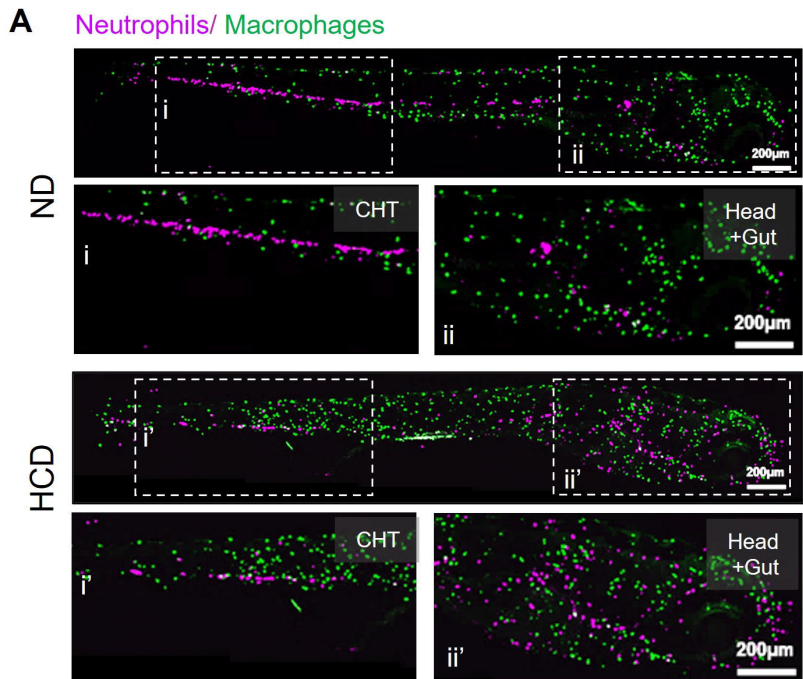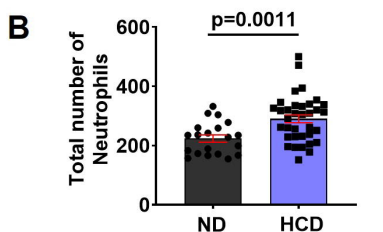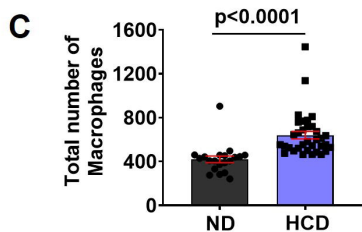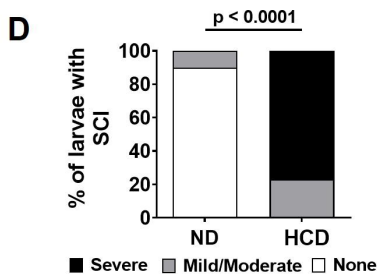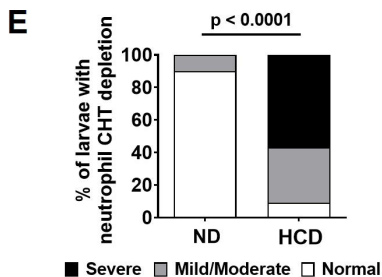

Figure 1

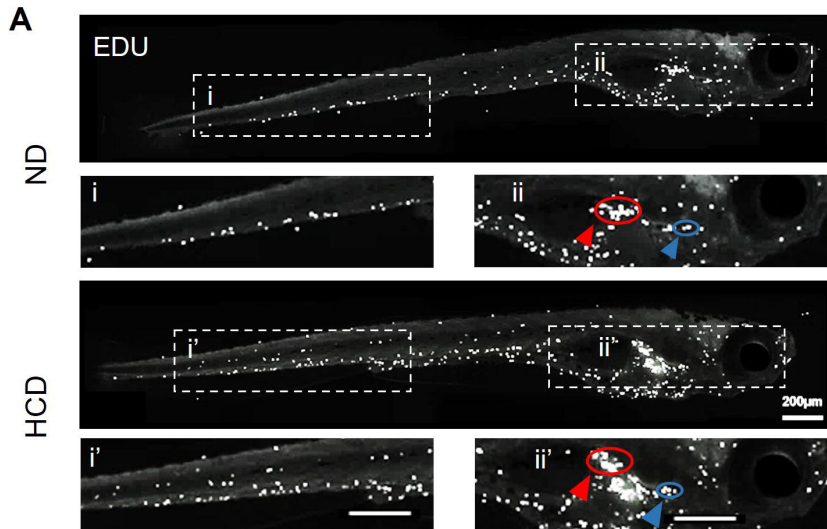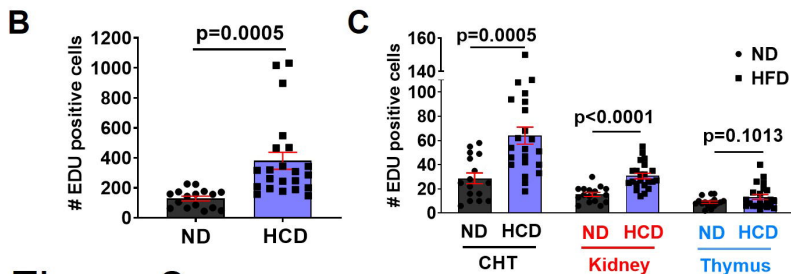

Figure 2

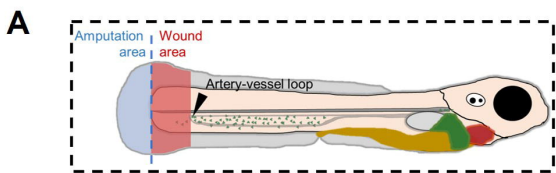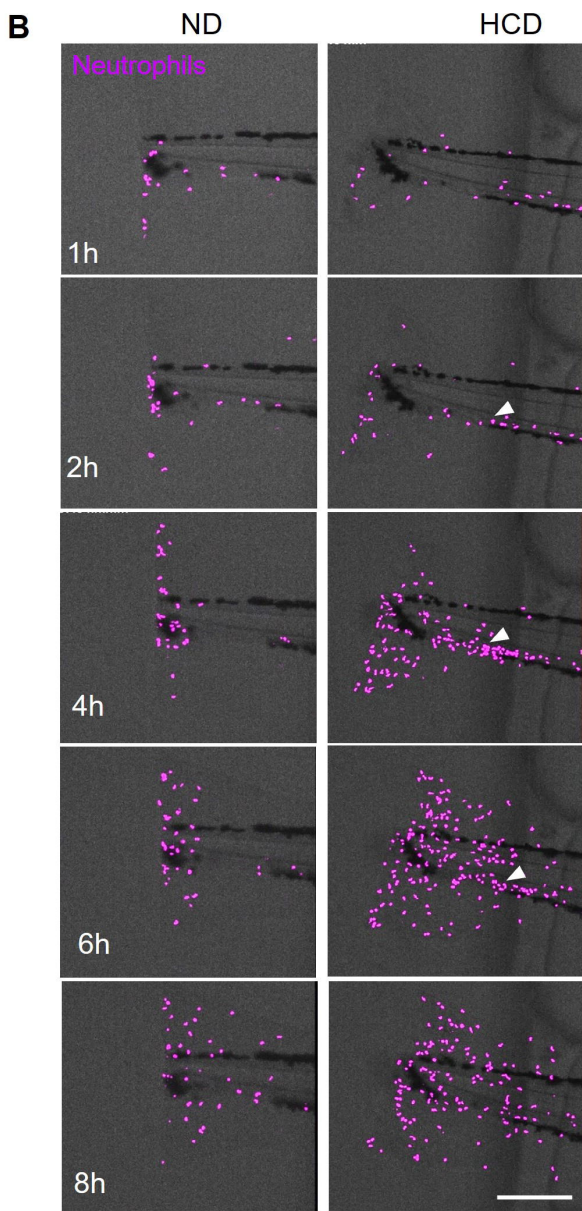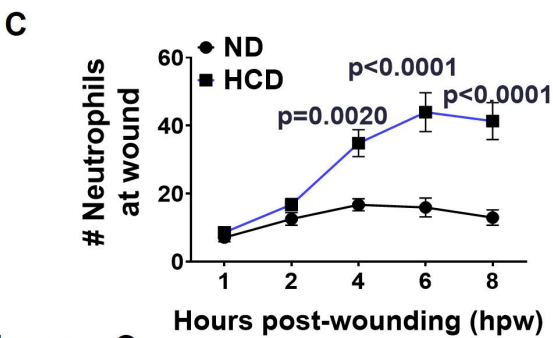

Figure 3

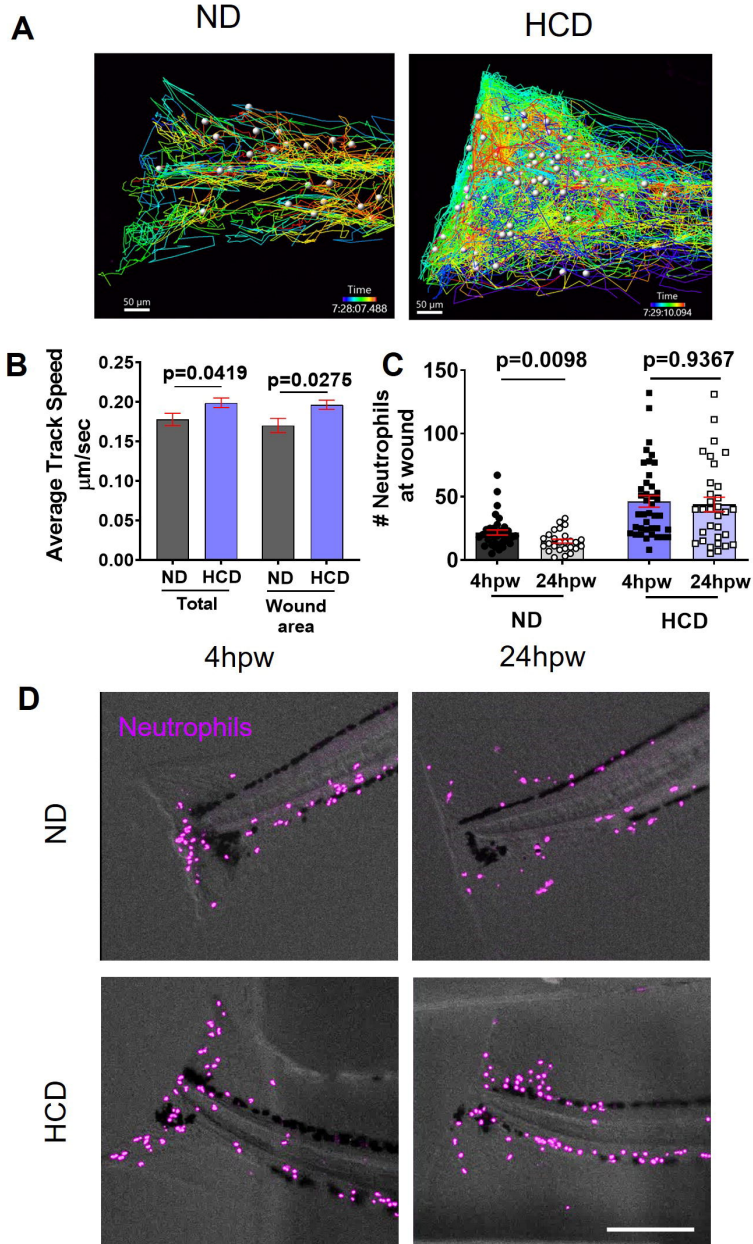

Figure 4



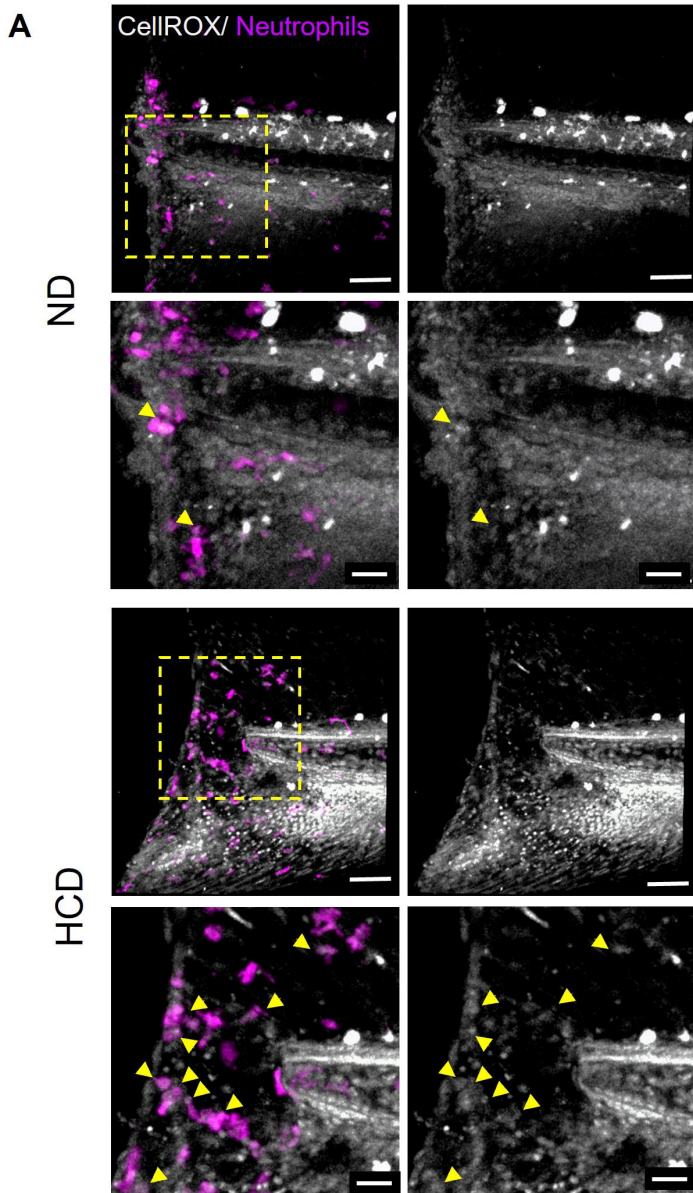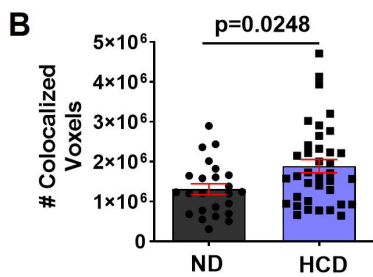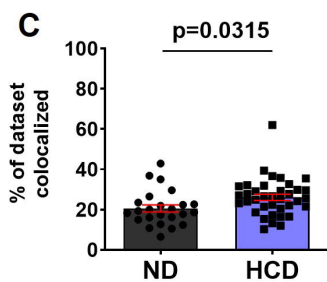

Figure 5

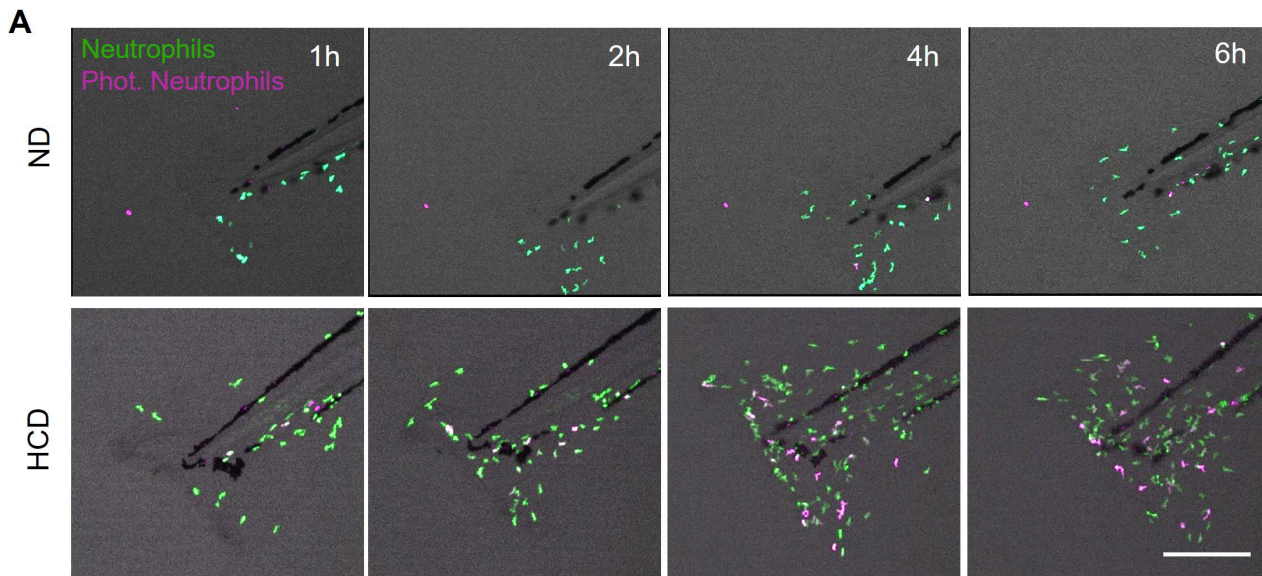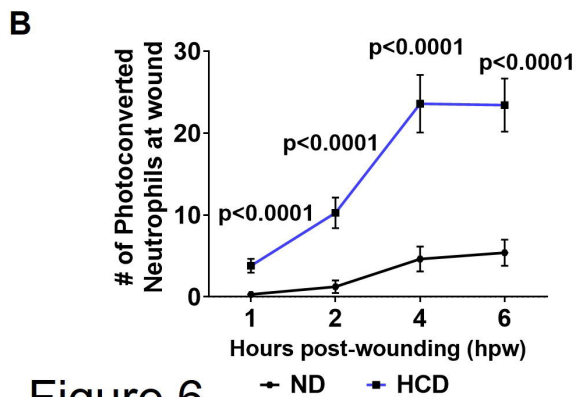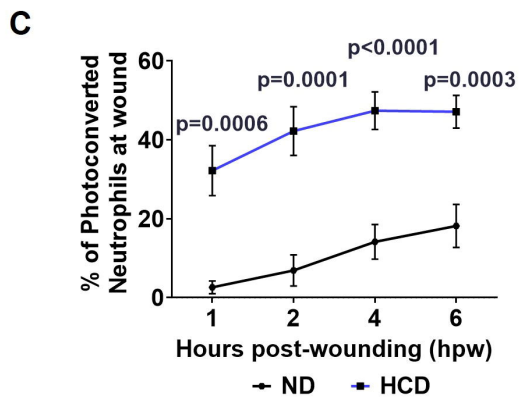

Figure 6



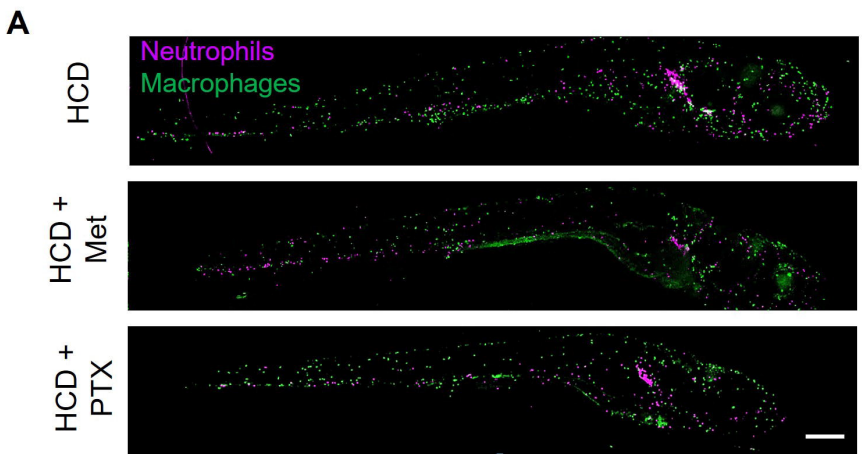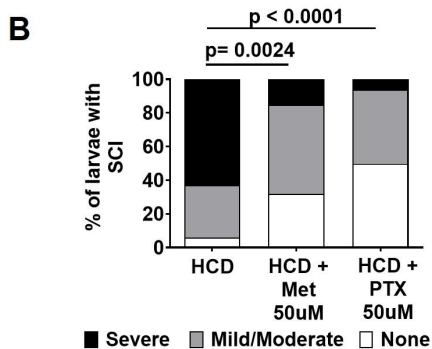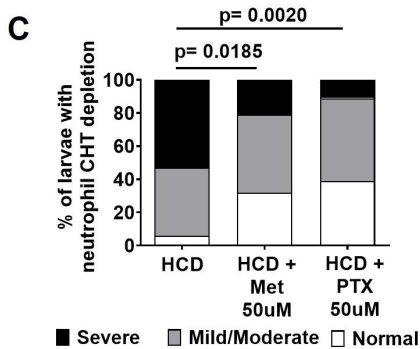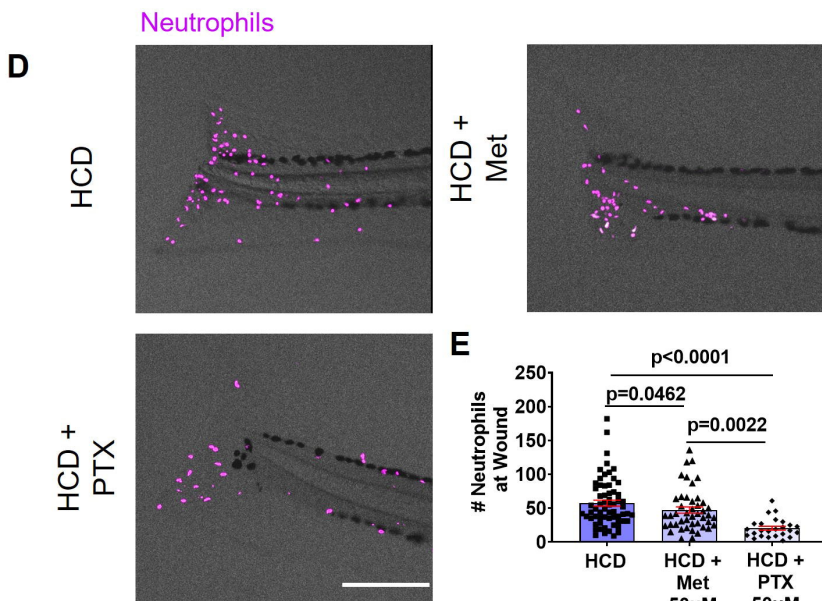

Figure 7
